# Supplementary material for: RTF2 controls replication repriming and ribonucleotide excision at the replisome
Source: PubMed Central journal article supplement — bioRxiv. 2023 Mar 13:2023.03.13.532415. Preprint. [Version 1] doi: 10.1101/2023.03.13.532415 (PMC10054921; doi:10.1101/2023.03.13.532415), 2023-03-13
Supplement: media-1.pdf [file media-1.pdf]

**Title: RTF2 controls replication repriming and ribonucleotide excision at the replisome**

**Authors:**

Brooke A. Conti<sup>1\*</sup>, Penelope D. Ruiz<sup>1\*</sup>, Cayla Broton<sup>1\*</sup>, Nicolas J. Blobel<sup>1</sup>, Molly C. Kottemann<sup>1</sup>, Sunandini Sridhar<sup>1</sup>, Francis P. Lach<sup>1</sup>, Tom Wiley<sup>1</sup>, Nanda K. Sasi<sup>2</sup>, Thomas Carroll<sup>3</sup>, & Agata Smogorzewska<sup>1</sup>

Supplementary Information includes:

|                        |                   |
|------------------------|-------------------|
| Supplementary Table 1. | Mouse strains     |
| Supplementary Table 2. | Cell lines        |
| Supplementary Table 3. | Primers           |
| Supplementary Table 4. | siRNAs and shRNAs |
| Supplementary Table 5. | Plasmids          |
| Supplementary Table 6. | Antibodies        |

Supplementary table 1. Mouse strains

| <b>MOUSE STRAIN</b>              | <b>SOURCE</b>        | <b>IDENTIFIER</b> |
|----------------------------------|----------------------|-------------------|
| Rtf2 <sup>tm1a(KOMP)wtsi</sup>   | This paper           |                   |
| B6.Cg Tg(ACTFLPe)9205Dym/J       | Jackson Laboratories | 005703            |
| B6.FVB/N-Tg(Ella-cre)C5379Lmgd/J | Jackson Laboratories | 003314            |
| C57BL/6J                         | Jackson Laboratories | 000664            |

Supplementary table 2. Mammalian cell lines

| CELL LINE                                                                                                                                                                                                                                                                                                                                                       | SOURCE                    | IDENTIFIER           |
|-----------------------------------------------------------------------------------------------------------------------------------------------------------------------------------------------------------------------------------------------------------------------------------------------------------------------------------------------------------------|---------------------------|----------------------|
| Human: HEK 293T                                                                                                                                                                                                                                                                                                                                                 | ATCC                      |                      |
| Human: HEK 293T endogenously GFP-tagged RTF2                                                                                                                                                                                                                                                                                                                    | This paper                | N/A                  |
| Human: BJ-hTERT-E6/7, male                                                                                                                                                                                                                                                                                                                                      | Smogorzewska Lab          |                      |
| Human: U2OS, female                                                                                                                                                                                                                                                                                                                                             | ATCC                      | HTB-96               |
| Human: RPE <i>p53</i> <sup>-/-</sup> , <i>pRb</i> <sup>-/-</sup> , PRIM1-AID-mClover                                                                                                                                                                                                                                                                            | de Lange Lab              |                      |
| Human: HeLa (HeLa Parental, HeLa WT Clone, HeLa RNASEH2A KO Clone), female                                                                                                                                                                                                                                                                                      | Durocher and Jackson Labs |                      |
| Human: HCT-116 <i>p53</i> <sup>-/-</sup> (HCT-116 <i>p53</i> <sup>-/-</sup> WT Clone, HCT-116 <i>p53</i> <sup>-/-</sup> RNASEH2A KO Clone)                                                                                                                                                                                                                      | Durocher and Jackson Labs |                      |
| Mouse: RTF2 MEFs ( <i>Rtf2</i> <sup>+/+</sup> , <i>Rtf2</i> <sup>+/<i>lox</i></sup> , <i>Rtf2</i> <sup>-/<i>lox</i></sup> , and <i>Rtf2</i> <sup><i>lox/lox</i></sup> , SV40-immortalized <i>Rtf2</i> <sup>-/-</sup> clone, <i>p53</i> <sup>-/-</sup> ; <i>Rtf2</i> <sup>+/<i>lox</i></sup> , <i>p53</i> <sup>-/-</sup> ; <i>Rtf2</i> <sup>-/<i>lox</i></sup> ) | This paper                | N/A                  |
| KOMP mES cells <i>Rtf2</i> <sup>tm1a(KOMP)wt</sup>                                                                                                                                                                                                                                                                                                              | KOMP                      | MGI code:<br>1913654 |

Supplementary table 3. Primers

| mESC long range genotyping primers                              |        |            |
|-----------------------------------------------------------------|--------|------------|
| Oligonucleotide                                                 | VENDOR | IDENTIFIER |
| mESCs Cassette 3' Universal Forward<br>cacacctccccctgaacctgaaac | IDT    | KOMP       |
| mESCs Cassette 5' Universal Reverse<br>ggtggtgtgggaaagggttcgaag | IDT    | KOMP       |
| mESCs Cassette GF3 gccgaagaaggtcgagaaggtcag                     | IDT    | KOMP       |
| mESCs Cassette GR3 cgaatctctccacctgctcaatccag                   | IDT    | KOMP       |

| RTF2 mouse genotyping primers             |        |            |
|-------------------------------------------|--------|------------|
| Oligonucleotide                           | VENDOR | IDENTIFIER |
| Genotyping_PCR1_Fwd gcctgtgagcttggcaggtg  | IDT    | This Paper |
| Genotyping_PCR1_Rev aggggaagacctgactgtgt  | IDT    | This Paper |
| Genotyping_PCR2_Fwd gcctgtgagcttggcaggtg  | IDT    | This Paper |
| Genotyping_PCR2_Rev agcctgagctctgtcacatt  | IDT    | This Paper |
| Genotyping_PCR3_Fwd gatattgctgaagagcttgg  | IDT    | This Paper |
| Genotyping_PCR3_Rev gaagtattctcgacgaagttc | IDT    | This Paper |

| RT-qPCR primers                                              |        |                  |
|--------------------------------------------------------------|--------|------------------|
| Oligonucleotide                                              | VENDOR | IDENTIFIER       |
| Mouse <i>Rtf2</i> RT-qPCR Forward gaagtgtgtcacacgtgtgg       | IDT    | This Paper       |
| Mouse <i>Rtf2</i> RT-qPCR Reverse ttcttttccagcttggccc        | IDT    | This Paper       |
| Human <i>RTF2</i> RT-qPCR Forward tgetgaagacaaggatggag       | IDT    | Kottemann et al  |
| Human <i>RTF2</i> RT-qPCR Reverse tgaaacagactctgtgcct        | IDT    | Kottemann et al. |
| Mouse <i>Rnaseh2a</i> RT-qPCR Forward gcatcttggccaaggtggcc   | IDT    | This Paper       |
| Mouse <i>Rnaseh2a</i> RT-qPCR Reverse ggtcttgggatcattgggat   | IDT    | This Paper       |
| Human <i>RNASEH2A</i> RT-qPCR Forward gctgaaagtggcagactcaa   | IDT    | This Paper       |
| Human <i>RNASEH2A</i> RT-qPCR Reverse caggttgatttgaccgcc     | IDT    | This Paper       |
| Human <i>RNASEH1</i> RT-qPCR Forward<br>aggaatcggcgtttactggg | IDT    | This Paper       |
| Human <i>RNASEH1</i> RT-qPCR Reverse<br>aggetgcatgaatttcgc   | IDT    | This Paper       |
| Human <i>DDI1</i> RT-qPCR Forward tggaaacacaacgtgctac        | IDT    | Kottemann et al. |
| Human <i>DDI1</i> RT-qPCR Reverse atctgtctgggggctgtct        | IDT    | Kottemann et al. |
| Human <i>DDI2</i> RT-qPCR Forward cgatgtagtgtgtgtactgc       | IDT    | Kottemann et al. |
| Human <i>DDI2</i> RT-qPCR Reverse ccagttagtagattctttaccactt  | IDT    | Kottemann et al. |
| Human <i>GAPDH</i> RT-qPCR Forward ggtcggagcaacggattt        | IDT    | This Paper       |
| Human <i>GAPDH</i> RT-qPCR Reverse gccccacttgatttggag        | IDT    | This Paper       |
| Mouse b-actin RT-qPCR Forward ctaaggccaaccgtgaaaag           | IDT    | Thongthip et al. |
| Mouse b-actin RT-qPCR Reverse accagaggcatacagggaca           | IDT    | Thongthip et al. |
| Human <i>PRIMI</i> Forward RT-qPCR gacagagcattgaaggagga      | IDT    | This Paper       |
| Human <i>PRIMI</i> Reverse RT-qPCR cgtcttgaccaccctttaca      | IDT    | This Paper       |
| Human <i>PRIMPOL</i> Forward RT-qPCR ggcacttcagtagaaacat     | IDT    | This Paper       |

|                                                          |     |            |
|----------------------------------------------------------|-----|------------|
| Human <i>PRIMPOL</i> Reverse RT-qPCR cgccgaattcctctttaat | IDT | This Paper |
|----------------------------------------------------------|-----|------------|

| Gateway cloning primers                                                          |        |            |
|----------------------------------------------------------------------------------|--------|------------|
| Oligonucleotide                                                                  | VENDOR | IDENTIFIER |
| attB human RNASEH2A Forward<br>ggggacaagttgtacaaaaagcaggcttcatggatctcagcgagctgga | IDT    | This Paper |
| attB human RNASEH2A Reverse<br>ggggaccactttgtacaagaaagctgggtctagaggctggttgetgact | IDT    | This Paper |
| attB mouse RTF2 Forward<br>ggggacaagttgtacaaaaagcaggcttcatgggttgcgacggaggcac     | IDT    | This Paper |
| attB mouse RTF2 Reverse<br>ggggaccactttgtacaagaaagctgggttcagaagcagtaggatgtgt     | IDT    | This Paper |
| attB human PRIM1 Forward<br>ggggacaagttgtacaaaaagcaggcttcatggagacgtttgacccac     | IDT    | This Paper |
| attB human PRIM1 Reverse<br>ggggaccactttgtacaagaaagctgggtttatttctcaaggaaaattt    | IDT    | This Paper |

| Mutagenesis cloning primers                                                                                          |        |            |
|----------------------------------------------------------------------------------------------------------------------|--------|------------|
| Oligonucleotide                                                                                                      | VENDOR | IDENTIFIER |
| human RNASEH2B_F300A;F301A Forward<br>ccaattttttttatttttaccacagcagcggtatcaatactttcattccactttgtca<br>acttttagcca      | IDT    | This Paper |
| human RNASEH2B_F300A;F301A Reverse<br>tggttaaagtgacaagagtggaaatgaaaagtattgataccgctgctggggtaaa<br>aaataaaaaaaaaaattgg | IDT    | This Paper |
| human RNASEH2A_D34A<br>cctgggctgctgagggcgggca                                                                        | IDT    | This Paper |
| human RNASEH2A_D169A<br>caaggccaagcagctgccctctaccgg                                                                  | IDT    | This Paper |
| human RNASEH2A_P40D<br>cgggcagggcgacgtgctgggccc                                                                      | IDT    | This Paper |
| human RNASEH2A_R210A<br>actgattatggctcaggcgcccccaatgatccaagac                                                        | IDT    | This Paper |

| CRISPR cloning primers                                             |        |            |
|--------------------------------------------------------------------|--------|------------|
| Oligonucleotide                                                    | VENDOR | IDENTIFIER |
| RTF2 5'BamHI aaaaggatcccatgggttgcgacggggga                         | IDT    | This paper |
| RTF2 3'NotI aaaagcggccgctcagaagcagtaggacgtgtgg                     | IDT    | This paper |
| hRTF 5' UTR Fwd INFUSION<br>accatgattacccaagcttactcttggacgggcatggc | IDT    | This paper |
| hRTF 5' UTR Rev INFUSION<br>tctcgccttctcaccatcgcaggacgggagtcagagc  | IDT    | This paper |

|                                                                |     |            |
|----------------------------------------------------------------|-----|------------|
| GFP Fwd INFUSION<br>atggtgagcaagggcgagga                       | IDT | This paper |
| hRTF rev INF<br>gagcgggtggcagtgccgggcttcagaagcagtaggacgtgt     | IDT | This paper |
| hRTF 3' UTR Fwd INF<br>agcccgcactgccaccgctc                    | IDT | This paper |
| hRTF 3' UTR Rev INF<br>aacgacggccagtgattctaacttataggcagataaaat | IDT | This paper |
| mouse sgTrp53 exon 5 Fwd<br>caccgaagtcacagcacatgacgg           | IDT | This paper |
| mouse sgTrp53 exon 5 Rev<br>aaaccgtcatgtgctgtgacttc            | IDT | This paper |

Supplementary table 4. siRNAs and shRNAs

| <b>Oligonucleotide</b>                                                             | <b>VENDOR</b>   | <b>IDENTIFIER</b> |
|------------------------------------------------------------------------------------|-----------------|-------------------|
| Luciferase siRNA (siCtrl)                                                          | Thermo Fischer  | 12935146          |
| hRNASEH1 siRNA 1 gggaaagaggugaucaacatt                                             | Ambion          | s48356            |
| hRNASEH1 siRNA 2 cagacaguauguuuacgautt                                             | Ambion          | s48357            |
| hRNASEH1 siRNA 3 cgggauuuauaggcauatt                                               | Ambion          | s48358            |
| hRNASEH2A siRNA 1 caaugaucceaagacaaatt                                             | Ambion          | s20656            |
| hRNASEH2A siRNA 2 ccaccgauuuuccggaatt                                              | Ambion          | s20657            |
| hRTF2 siRNA 1 caaagaugccgucauugaatt                                                | Ambion          | s226737           |
| hPrim1 siRNA 1 gaaccagagauuuaagaatt                                                | Ambion          | s11050            |
| hPrim1 siRNA 2 caugcucucugguauauuatt                                               | Ambion          | s11051            |
| hPrim1 siRNA 3 caacuacgguggagugauatt                                               | Ambion          | s10052            |
| hPrimpol siRNA 1 ggcuauugauagaguuaaatt                                             | Ambion          | s11053            |
| hPrimpol siRNA 2 ccacgaagaagagaucauatt                                             | Ambion          | s11054            |
| hPrimpol siRNA 3 ggauccuucgauuuagatt                                               | Ambion          | s11055            |
| hDDI1 siRNA1 ccggagacaucaauguuccaucgat                                             | ThermoFisher    | HSS181016         |
| hDDI1 siRNA 2 ggaaauuacacauucagucauggat                                            | ThermoFisher    | HSS140552         |
| hDDI1 siRNA 3 ccggagacaucaauguuccaucgat                                            | ThermoFisher    | HSS140553         |
| hDDI2 shRNA uggaaaucgauacagcuca                                                    | Open Biosystems | V3LHS_328065      |
| mRNASEH2A shRNA #1<br>ccgggctcgattacaacagcactttctcgagaaagtgtgtgtaatcgag<br>cttttg  | MilliporeSigma  | TRC0000119585     |
| mRNASEH2A shRNA #2<br>ccggcgggtcgttgcgtctgagttctcgagaactcagacgacaacgac<br>ccgttttg | MilliporeSigma  | TRC0000119584     |

Supplementary Table 5. Plasmids

| <b>Plasmid</b>                                                                            | <b>VENDOR</b>       | <b>IDENTIFIER</b> |
|-------------------------------------------------------------------------------------------|---------------------|-------------------|
| <b><i>Gateway Entry Vectors</i></b>                                                       |                     |                   |
| pDONOR233; spectinomycin resistant; Gateway                                               | Hill and Vidal Labs | pDONOR233         |
| pENTR223-EV; spectinomycin resistant; Gateway                                             | Smogorzewska Lab    | AS183             |
| pENTR223-mRTF2; spectinomycin resistant; Gateway                                          | This paper          | BC153             |
| pENTR223-RNASEH2A; spectinomycin resistant; Gateway                                       | This paper          | NJB2              |
| pENTR223-RNASEH2A <sup>CD</sup> _D34A;D169A; spectinomycin; Gateway                       | This paper          | NJB6              |
| pENTR223-RNASEH2A <sup>IOF</sup> _P40D;Y210A; spectinomycin; Gateway                      | This paper          | NJB11             |
| pENTR223-RNASEH2B; spectinomycin resistant; Gateway                                       | This paper          | NJB27             |
| pENTR223-RNASEH2B <sup>PIPm</sup> _F300A;F301A; spectinomycin resistant; Gateway          | This paper          | NJB29             |
| pENTR223-hPRIM1; spectinomycin resistant; Gateway                                         | This paper          | CB35              |
| <b><i>Retroviral expression vectors</i></b>                                               |                     |                   |
| PEA59-GFP-EV-dest (destination vector); chloramphenicol and ampicillin resistant; Gateway | Smogorzewska Lab    | AS769             |
| PEA59-GFP-EV-puro; ampicillin resistant; retroviral; Gateway                              | Smogorzewska Lab    | AS1050            |
| PEA59-GFP-mRTF2-puro; retroviral; ampicillin resistant; Gateway                           | This paper          | BC123             |
| pMSCVpuro-DEST (destination vector); chloramphenicol and ampicillin resistant; Gateway    | Addgene             | Plasmid# 119745   |
| pMSCVpuro-EV; ampicillin; Gateway                                                         | This paper          | NJB22             |
| pMSCVpuro-RNASEH2A; ampicillin; Gateway                                                   | This paper          | NJB18             |
| pMSCVpuro-RNASEH2A-siRNA Resistant; ampicillin; Gateway                                   | This paper          | NJB19             |
| pMSCVpuro-RNASEH2A <sup>CD</sup> _D34A;D169A -siRNA Resistant; ampicillin; Gateway        | This paper          | NJB20             |
| pMSCVpuro- RNASEH2A <sup>IOF</sup> _P40D;Y210A-siRNA Resistant; ampicillin; Gateway       | This paper          | NJB20             |
| pMSCV PM shRNA Control puro                                                               | Elledge lab         | BC75              |
| pMSCV PM shRNA shDDI2 puro                                                                | Smogorzewska Lab    | MK59-63           |
| pMSCV-GFP-H2B-hygro                                                                       | Smogorzewska Lab    | YK77              |
| pEGFP-RNASEH2B; kanamycin resistant; Gateway                                              | Addgene             | Plasmid #108697   |
| pMMP Hit & Run Cre; retroviral; self-excising                                             | Livingston Lab      | NA                |
| pWZL Cre-hygro; retroviral                                                                | de Lange Lab        | NA                |



|                                                                                                                             |                  |                                 |
|-----------------------------------------------------------------------------------------------------------------------------|------------------|---------------------------------|
| pMSCV-HA-FLAG-Dest: destination vector; chloramphenicol and ampicillin resistant; Gateway                                   | Smogorzewska Lab | AMS157                          |
| pMSCV-HA-FLAG-EV: ampicillin resistant; Gateway                                                                             | Smogorzewska Lab | AMS184                          |
| pMSCV-HA-FLAG-hPRIM1: ampicillin resistant; Gateway                                                                         | This paper       | CB36                            |
| <b><i>Lentiviral expression vectors</i></b>                                                                                 |                  |                                 |
| pLKO.1 shRNASEH2A #1_puro; ampicillin resistant                                                                             | MilliporeSigma   | SHCLNG-NM_027187, TRC0000119585 |
| pLKO.1 shRNASEH2A #2_puro; ampicillin resistant                                                                             | MilliporeSigma   | SHCLNG-NM_027187, TRC0000119584 |
| pLKO.1 shRNA Control Plasmid puro; ampicillin resistant;                                                                    | MilliporeSigma   | SHC002                          |
| pLVpuro-CMV-N-EGFP; destination vector; chloramphenicol and ampicillin resistant; Gateway                                   | Addgene          | Plasmid #122848                 |
| pLVpuro-CMV-N-EGFP- RNASEH2B; ampicillin resistant; Gateway                                                                 | This paper       | PR3                             |
| pLVpuro-CMV-N-EGFP- RNASEH2B <sup>PIPm</sup> _F300A;F301A; ampicillin resistant; Gateway                                    | This paper       | PR5                             |
| <b><i>Other expression vectors</i></b>                                                                                      |                  |                                 |
| ppyCAG RNaseH1 WT; ampicillin resistant                                                                                     | Addgene          | Plasmid #111906                 |
| ppyCAG RNaseH1 D210N; ampicillin resistant                                                                                  | Addgene          | Plasmid #11904                  |
| <b><i>CRISPR generation of GFP-AID-RTF2 HEK 293Ts</i></b>                                                                   |                  |                                 |
| pcDNA5-FRT-TO-EGFP-AID                                                                                                      | Addgene          | Plasmid #80075                  |
| MLM3636                                                                                                                     | Addgene          | Plasmid #43860                  |
| MLM3636 5' UTR_1 sequence<br>acgctagggcgcggtagcg                                                                            | This paper       | BC201, 202                      |
| px330                                                                                                                       | Addgene          | Plasmid #42230                  |
| px330 3'UTR_1 atgtgaggcgtgctcggtcc                                                                                          | This paper       | BC204, 206                      |
| pUC19-5UTR-GFP-AID-hRTF2-3UTR Homology Donor Construct                                                                      | This paper       | BC219                           |
| <b><i>CRISPR generation of p53<sup>-/-</sup>;Rtf2<sup>+/-lox</sup> and p53<sup>-/-</sup>;Rtf2<sup>-/-lox</sup> MEFs</i></b> |                  |                                 |
| pSpCas9(BB)-2A-Puro (PX459) V2.0                                                                                            | Addgene          | Plasmid #62988                  |
| pX459-sgTRP53                                                                                                               | This paper       | NJB92                           |
| <b><i>Protein Biochemistry</i></b>                                                                                          |                  |                                 |
| PSKA002 HIS14-SUMO-MCS Expression Vector                                                                                    | Klinge Lab       |                                 |
| PSKA002 HIS14-SUMO-RTF2                                                                                                     | This paper       | BC142                           |

|                                                                     |              |                 |
|---------------------------------------------------------------------|--------------|-----------------|
| PSKA008 HIS14-GFP-MCS-Expression Vector                             | Klinge Lab   |                 |
| PSKA008 HIS14-GFP-RTF2                                              | This paper   | BC138           |
| pGEX6P1-hsRNASEH2BCA                                                | Addgene      | Plasmid #108692 |
| <b><i>Protein Biochemistry</i></b>                                  |              |                 |
| VSV-G; retroviral packaging                                         | Mulligan lab | AMS166          |
| Gagpol; retroviral packaging                                        | Mulligan lab | AMS167          |
| pMD2.G (VSV-G envelope expressing plasmid);<br>lentiviral packaging | Addgene      | Plasmid #12259  |
| psPAX2; lentiviral packaging                                        | Addgene      | Plasmid #12260  |

Supplementary Table 6. Antibodies

| ANTIBODY                                                                        | SOURCE                       | IDENTIFIER                                   | LOT (if known) |
|---------------------------------------------------------------------------------|------------------------------|----------------------------------------------|----------------|
| <i>Primary Antibodies</i>                                                       |                              |                                              |                |
| Mouse IgG                                                                       | Santa Cruz                   | Cat# sc-2025,<br>RRID:AB_73718<br>2          | D2022          |
| Rabbit IgG                                                                      | Santa Cruz                   | Cat# sc-2027,<br>RRID:AB_73719<br>7          |                |
| Rabbit IgG                                                                      | Cell Signaling<br>Technology | Cat# 2729,<br>RRID:AB_10310<br>62            | 10             |
| Mouse monoclonal anti- $\alpha$ -tubulin (clone DM1A), WB:1:5000                | MilliporeSigma               | Cat# T9026,<br>RRID:AB_47759<br>3            | 0000137585     |
| Mouse monoclonal anti- $\gamma$ H2AX Ser139 (clone JBW301), IF 1:2000           | MilliporeSigma               | Cat# 05-636,<br>RRID:AB_30986<br>4           | 3782118        |
| Mouse monoclonal anti-biotin, IF: 1:2000                                        | Jackson<br>ImmunoResearch    | Cat# 200-002-<br>211,<br>RRID:AB_23390<br>06 | 151728         |
| Rabbit monoclonal anti-biotin, IF: 1:2000                                       | Bethyl                       | A150-109A                                    | 11             |
| Mouse monoclonal anti-BrdU (B44),<br>combing: 1:10                              | BD Biosciences               | Cat#<br>347580, RRID:A<br>B_400326           | 9172603        |
| Mouse monoclonal anti-Poly (ADP-<br>Ribose) Polymer antibody [10H],<br>WB:1:100 | Abcam                        | Cat # ab14459,<br>RRID:AB_30123<br>9         |                |
| Mouse monoclonal anti-PCNA (PC10),<br>WB: 1:1000                                | Santa Cruz                   | Cat# sc-56,<br>RRID:AB_62811<br>0            | K1121          |
| Mouse Monoclonal anti-vinculin,<br>Unconjugated, Clone hVIN-1                   | MilliporeSigma               | Cat# V9131,<br>RRID:AB_47762<br>9            | 018M4779V      |
| Rat monoclonal anti-BrdU [BU1/75<br>(ICR1)], combing: 1:20                      | Abcam                        | Cat# ab6326,<br>RRID:AB_30542<br>6           |                |
| Rabbit monoclonal anti-MCM7<br>(D10A11) XP, WB: 1:1000                          | Cell Signaling<br>Technology | Cat# 3735S,<br>RRID:AB_21427<br>05           | 3              |
| Rabbit polyclonal anti-c20orf43 (RTF2),<br>WB: 1:500                            | Novus                        | Cat# NBP2-<br>30645                          | R72074         |
| Rabbit polyclonal anti-RTF2, WB: 1:500                                          | Proteintech                  | Cat# 16633-1-<br>AP, RRID:<br>AB_2256547     | 00074586       |

|                                                        |                          |                                             |              |
|--------------------------------------------------------|--------------------------|---------------------------------------------|--------------|
| Mouse monoclonal anti-RTF2 (clone OTI1E8), WB: 1:1000  | LS Bio                   | Cat# LS-C340588                             | 75213        |
| Rabbit polyclonal anti-GFP                             | Smogorzewska Lab         | Kotteman et al.                             |              |
| Rabbit polyclonal anti-GFP                             | Abcam                    | Cat# ab290<br>RRIDL<br>AB_303395            | GR3251545-1  |
| Mouse monoclonal Anti-GFP, WB: 1:3000                  | Roche                    | Cat#<br>11814460001                         |              |
| Rabbit polyclonal anti-RNASEH2A, WB: 1:500             | Proteintech              | Cat# 16132-1-<br>AP,<br>RRID:AB_22697<br>29 | 00023264     |
| Rabbit polyclonal anti-RNASEH2A, WB: 1:500             | Abcam                    | Cat# ab83943,<br>RRID:AB_18611<br>75        | GR3212381-12 |
| Mouse monoclonal anti-RNASEH2A, WB:1:500               | Santa Cruz               | Cat# sc-515475                              |              |
| Rabbit polyclonal anti-RNASEH2C, WB: 1:500             | AbClonal                 | Cat# A13884,<br>RRID:AB_27607<br>37         | 0067820201   |
| Rabbit polyclonal anti-RNASEH2C, WB: 1:500             | Abcam                    | Cat# ab89726,<br>RRID:AB_20428<br>15        | GR74866-1    |
| Rabbit polyclonal anti-RNASEH2B, WB: 1:1000            | Thermo Fisher Scientific | Cat# PA5-59059,<br>RRID:AB_26466<br>10      | V13088599    |
| Rabbit polyclonal anti-RNASEH2B, WB: 1:1000            | Atlas Antibodies         | Cat#<br>HPA041469,<br>RRID:AB_26774<br>96   | 000043725    |
| Rabbit polyclonal anti-phospho-RPA32 (S4/8), WB:1:1000 | Bethyl                   | Cat# A300-245A,<br>RRID:AB_21054<br>7       | 7            |
| Rabbit polyclonal anti-RPA32, WB 1:2000                | Bethyl                   | Cat# A300-244A,<br>RRID:AB_18554<br>8       | 3            |
| Rabbit polyclonal anti-PRIM1, WB:1000                  | Proteintech              | Cat # 10773-1-<br>AP<br>RRID:AB_22375<br>49 | 00009142     |
| Mouse monoclonal anti-HA.11 Epitope Tag, WB: 1:3000    | BioLegend                | Cat# 901514,<br>RRID:AB_25653<br>36         | B272772      |

|                                                                                       |                             |                                      |              |
|---------------------------------------------------------------------------------------|-----------------------------|--------------------------------------|--------------|
| Mouse monoclonal anti-V5 tag antibody [SV5-PK1], WB: 1:5000                           | Abcam                       | (Abcam Cat# ab27671, RRID:AB_471093) | GR3337308-16 |
| Sheep polyclonal anti-human RNase H2 complex, WB: 1:500                               | Jackson Lab                 |                                      |              |
|                                                                                       |                             |                                      |              |
| <b><i>Secondary Antibodies</i></b>                                                    |                             |                                      |              |
| Goat Anti-Mouse IgG H&L Cross-Absorbed (Alexa Fluor® 488), IF: 1:1000, combing: 1:100 | ThermoFisher                | Cat# A-11001, RRID: A B_2534069      | 632115       |
| Goat Anti-Mouse IgG H&L Cross-Absorbed (Alexa Fluor® 647), combing: 1:100             | ThermoFisher                | Cat# A-21235, RRID: AB_2535804       | 1837146      |
| Goat Anti-Rabbit IgG H&L (Alexa Fluor® 488)                                           | ThermoFisher                | Cat# A-11008, RRID: AB_143165        | 645151       |
| Goat Anti-Rat IgG H&L Cross-Absorbed (Alexa Fluor® 594), IF: 1:1000, combing: 1:100   | ThermoFisher                | Cat# A-11007, RRID: AB_10561522      | 2107787      |
| Peroxidase-AffiniPure Goat Anti-Mouse IgG (H + L) antibody, WB: 1:5000                | Jackson ImmunoResearch Labs | Cat# 115-035-003, RRID: AB_10015289  |              |
| Peroxidase-AffiniPure Donkey Anti-Sheep IgG (H + L) antibody, WB: 1:5000              | Jackson ImmunoResearch Labs | Cat# 713-035-003, RRID: AB_2340709   |              |
| Peroxidase-AffiniPure Goat Anti-Rabbit IgG (H + L) antibody, WB: 1:5000               | Jackson ImmunoResearch Labs | Cat# 115-035-144, RRID: AB_2307391   |              |
